# Supplementary material
Source: PubMed Central journal article supplement (PMC2040873)
Supplement: pnas_0610850104_6.pdf [file pnas_0610850104_6.pdf]

**Table 4.** Peptide WtBuNle: Ac-Arg-Trp-Val-Glu-Val-Asn-Gly-Orn-tbutylNle-Ile-Leu-Gln-NH<sub>2</sub>

|           | $\alpha$         | $\beta$   | $\gamma$       | $\delta$    | $\epsilon$                                     | Amide | Amine     |
|-----------|------------------|-----------|----------------|-------------|------------------------------------------------|-------|-----------|
| R         | 4.49             | 1.68      | 1.57           | 3.15        |                                                | 8.03  | 7.13,6.63 |
| W         | 5.12             | 3.08      | 7.451,7.287    | 7.210,7.193 | 6.986                                          | 8.30  | 10.11     |
| V         | 4.49             | 2.02      | 0.86           |             |                                                | 9.20  |           |
| E         | 5.05             | 2.00      | 2.20           |             |                                                | 8.30  |           |
| V         | 4.21             | 1.93      | 0.90           |             |                                                | 9.03  |           |
| N         | 4.41             | 3.04,2.73 |                |             |                                                | 9.52  |           |
| G         | 4.1055,<br>3.692 |           |                |             |                                                | 8.64  |           |
| O         | 4.67             | 1.77      | 1.77           | 3.04        |                                                | 7.72  | 7.64      |
| tbutylNle | 4.78             | 1.68      | 1.20           | 1.02        | 0.91<br>(CH <sub>3</sub> ) <sub>3</sub> =0.639 | 8.42  |           |
| I         | 4.63             | 1.85      | 1.42,1.17,0.87 | 0.87        |                                                | 9.31  |           |
| L         | 3.95             | 1.25      | 0.92           | 0.38,0.095  |                                                | 8.19  |           |
| Q         | 4.31             | 2.01      | 2.26           |             |                                                | 8.70  |           |
