# Supplementary material
Source: PubMed Central journal article supplement (PMC2040873)
Supplement: pnas_0610850104_8.pdf [file pnas_0610850104_8.pdf]

**Table 6.** Peptide WtBuNleCyc: Ac-Cys-Arg-Trp-Val-Glu-Val-Asn-Gly-Orn-tbutylNle-Ile-Leu-Gln-Cys-NH<sub>2</sub>

|           | $\alpha$    | $\beta$     | $\gamma$        | $\delta$          | $\epsilon$                                      | Amide |
|-----------|-------------|-------------|-----------------|-------------------|-------------------------------------------------|-------|
| C         | 5.23        | 2.999,2.374 |                 |                   |                                                 |       |
| R         | 4.615       | 1.80        | 1.51            | 3.16              |                                                 | 8.725 |
| W         | 5.13        | 3.06        |                 |                   |                                                 | 8.56  |
| V         | 4.53        | 2.02        | 0.874           |                   |                                                 | 9.49  |
| E         | 5.07        | 1.99        | 2.186           |                   |                                                 | 8.60  |
| V         | 4.233       | 1.912       | 0.897           |                   |                                                 | 9.13  |
| N         | 4.397       | 3.085,2.74  |                 |                   |                                                 |       |
| G         | 4.108,3.686 |             |                 |                   |                                                 |       |
| O         | 4.702       | 1.78        | 1.78            | 3.046             |                                                 | 7.75  |
| tbutylNle | 4.92        | 1.717       | 1.241           | 0.928             | 0.928<br>(CH <sub>3</sub> ) <sub>3</sub> =0.655 |       |
| I         | 4.702       | -----       | 1.40,1.16,0.866 | 0.866             |                                                 | 9.49  |
| L         | 3.866       | 1.257       | 0.350           | -0.072,<br>-0.361 |                                                 | 8.233 |
| Q         | 4.545       | 1.83        | 2.14            |                   |                                                 | 8.999 |
| C         | 5.053       | 2.936       |                 |                   |                                                 |       |
